# Supplementary material for: Genetic variation and forensic efficiency of 30 indels for three ethnic groups in Guangxi: relationships with other populations
Source: PeerJ. 2019 May 3;7:e6861. doi: 10.7717/peerj.6861 (PMC6501771; doi:10.7717/peerj.6861)
Supplement: Supplemental Information 4 [file peerj-07-6861-s004.xlsx]

## Sheet: Sheet1
	BeijingHan	GuangdongHan	ShanghaiHan	Yi	Bai	Xibe	SouthKorean	TibetTibetan	QinghaiTibetan	She	Vietnamese	Kazak	Uigur	Dane	Hungarian	Basque	CentralSpanish	Uruguayan	ChihuahuaMexican	JaliscoMexican	MexicoMexican	VeracruzMexican	YucatanMexican	MexicanAmerindian	Nigeria	Yao	Kelao
GuangdongHan	0.0019
ShanghaiHan	0.0011	0.0006
Yi	0.0054	0.0038	0.004
Bai	0.002	0.0021	0.0014	0.0038
Xibe	0.0022	0.0023	0.0015	0.0052	0.0023
SouthKorean	0.0024	0.0017	0.0008	0.0042	0.0019	0.0016
TibetTibetan	0.0029	0.005	0.0036	0.0066	0.0023	0.0034	0.0037
QinghaiTibetan	0.0022	0.0034	0.0021	0.0056	0.0016	0.0019	0.0023	0.0012
She	0.0023	0.0015	0.0019	0.0051	0.0033	0.0032	0.0028	0.0059	0.0041
Vietnamese	0.0032	0.0007	0.0015	0.0035	0.0026	0.003	0.0026	0.0059	0.0045	0.0022
Kazak	0.0083	0.01	0.0096	0.0133	0.008	0.0068	0.0115	0.0072	0.0075	0.0112	0.01
Uigur	0.01	0.0118	0.0114	0.0163	0.0089	0.0092	0.0135	0.0091	0.0089	0.0133	0.0118	0.0013
Dane	0.0251	0.0265	0.0264	0.0315	0.0233	0.0227	0.0288	0.0242	0.0235	0.0275	0.0259	0.0093	0.0083
Hungarian	0.0255	0.0275	0.0271	0.0325	0.0234	0.0231	0.0295	0.0237	0.0232	0.0289	0.0273	0.0084	0.0068	0.0026
Basque	0.027	0.0268	0.027	0.0328	0.0242	0.0236	0.0287	0.0261	0.0256	0.0288	0.0255	0.0111	0.0096	0.0048	0.0045
CentralSpanish	0.0262	0.0269	0.0268	0.0323	0.0237	0.0226	0.0288	0.0236	0.0235	0.0285	0.0257	0.0085	0.0069	0.003	0.0022	0.0033
Uruguayan	0.023	0.0244	0.024	0.0286	0.0207	0.0203	0.0258	0.0207	0.0201	0.0255	0.0232	0.0067	0.0057	0.0039	0.0021	0.0043	0.0023
ChihuahuaMexican	0.0445	0.0471	0.0465	0.0522	0.0449	0.0441	0.05	0.046	0.0442	0.0525	0.0481	0.0278	0.0241	0.0183	0.0156	0.0212	0.02	0.0207
JaliscoMexican	0.0437	0.045	0.0448	0.0512	0.0435	0.042	0.0484	0.0452	0.043	0.0502	0.0463	0.026	0.0225	0.017	0.0137	0.0197	0.0181	0.0189	0.0017
MexicoMexican	0.0534	0.0548	0.0544	0.0602	0.0524	0.0517	0.0576	0.0545	0.0528	0.0606	0.0556	0.0345	0.0313	0.0222	0.021	0.0256	0.0258	0.0274	0.0048	0.0041
VeracruzMexican	0.0498	0.05	0.0502	0.0566	0.0485	0.0473	0.0535	0.0501	0.0483	0.0555	0.0509	0.0301	0.0263	0.0192	0.016	0.0209	0.0197	0.0223	0.004	0.0024	0.003
YucatanMexican	0.0588	0.0599	0.0598	0.0675	0.0595	0.0569	0.0633	0.0613	0.0587	0.0655	0.0613	0.0391	0.0351	0.0267	0.023	0.0277	0.0279	0.03	0.0048	0.0046	0.0041	0.0031
MexicanAmerindian	0.0718	0.0724	0.0732	0.0798	0.0716	0.0698	0.077	0.0752	0.0718	0.0796	0.0749	0.0519	0.0477	0.0365	0.0317	0.0389	0.0393	0.0427	0.0093	0.009	0.0087	0.0064	0.0053
Nigeria	0.0558	0.0565	0.0552	0.0617	0.0524	0.05	0.0532	0.0507	0.0476	0.0569	0.0564	0.037	0.034	0.039	0.0367	0.039	0.0318	0.0288	0.0558	0.0532	0.0661	0.0568	0.0645	0.0831
Yao	0.0053	0.0034	0.0045	0.0065	0.0054	0.0065	0.0059	0.0086	0.0063	0.0045	0.0043	0.015	0.017	0.0305	0.0319	0.0351	0.0327	0.0301	0.0552	0.0526	0.0631	0.0573	0.0691	0.0788	0.0617
Kelao	0.0035	0.001	0.0018	0.0043	0.0023	0.0031	0.0028	0.0063	0.0041	0.0026	0.0008	0.0096	0.0112	0.0238	0.0249	0.0239	0.0237	0.0214	0.0451	0.0431	0.0525	0.0478	0.0578	0.0697	0.0538	0.0042
Zhuang	0.0041	0.001	0.0021	0.0048	0.0032	0.004	0.0031	0.0075	0.0056	0.0025	0.0012	0.0124	0.0144	0.0281	0.0293	0.0269	0.0281	0.026	0.0522	0.0496	0.0601	0.0548	0.0652	0.0773	0.0597	0.0042	0.0011

## Sheet: Sheet2
						BeijingHan	GuangdongHan	ShanghaiHan	Yi	Bai	Xibe	SouthKorean	TibetTibetan	QinghaiTibetan	She	Vietnamese	Kazak	Uigur	Dane	Hungarian	Basque	CentralSpanish	Uruguayan	ChihuahuaMexican	JaliscoMexican	MexicoMexican	VeracruzMexican	YucatanMexican	MexicanAmerindian	Nigeria	Yao	Kelao	Zhuang
						1	2	3	4	5	6	7	8	9	10	11	12	13	14	15	16	17	18	19	20	21	22	23	24	25	26	27	28
[1] BeijingHan	Sino-Tibetan	BeijingHan		BeijingHan	[1]
[2] #GuangdongHan	Sino-Tibetan	#GuangdongHan	#	GuangdongHan	[2]	0.0019
[3] #ShanghaiHan	Sino-Tibetan	#ShanghaiHan	#	ShanghaiHan	[3]	0.0011	0.0006
[4] #Yi	Sino-Tibetan	#Yi	#	Yi	[4]	0.0054	0.0038	0.004
[5] #Bai	Sino-Tibetan	#Bai	#	Bai	[5]	0.002	0.0021	0.0014	0.0038
[6] #Xibe	Altaic	#Xibe	#	Xibe	[6]	0.0022	0.0023	0.0015	0.0052	0.0023
[7] #SouthKorean	Altaic	#SouthKorean	#	SouthKorean	[7]	0.0024	0.0017	0.0008	0.0042	0.0019	0.0016
[8] #TibetTibetan	sino-tibetan	#TibetTibetan	#	TibetTibetan	[8]	0.0029	0.005	0.0036	0.0066	0.0023	0.0034	0.0037
[9] #QinghaiTibetan	sino-tibetan	#QinghaiTibetan	#	QinghaiTibetan	[9]	0.0022	0.0034	0.0021	0.0056	0.0016	0.0019	0.0023	0.0012
[10] #She	sino-tibetan	#She	#	She	[10]	0.0023	0.0015	0.0019	0.0051	0.0033	0.0032	0.0028	0.0059	0.0041
[11] #Vietnamese	Austro-Asiatic	#Vietnamese	#	Vietnamese	[11]	0.0032	0.0007	0.0015	0.0035	0.0026	0.003	0.0026	0.0059	0.0045	0.0022
[12] #Kazak	Altaic	#Kazak	#	Kazak	[12]	0.0083	0.01	0.0096	0.0133	0.008	0.0068	0.0115	0.0072	0.0075	0.0112	0.01
[13] #Uigur	Altaic	#Uigur	#	Uigur	[13]	0.01	0.0118	0.0114	0.0163	0.0089	0.0092	0.0135	0.0091	0.0089	0.0133	0.0118	0.0013
[14] #Dane	Indo-European	#Dane	#	Dane	[14]	0.0251	0.0265	0.0264	0.0315	0.0233	0.0227	0.0288	0.0242	0.0235	0.0275	0.0259	0.0093	0.0083
[15] #Hungarian	Uralc	#Hungarian	#	Hungarian	[15]	0.0255	0.0275	0.0271	0.0325	0.0234	0.0231	0.0295	0.0237	0.0232	0.0289	0.0273	0.0084	0.0068	0.0026
[16] #Basque	Basque	#Basque	#	Basque	[16]	0.027	0.0268	0.027	0.0328	0.0242	0.0236	0.0287	0.0261	0.0256	0.0288	0.0255	0.0111	0.0096	0.0048	0.0045
[17] #CentralSpanish	Indo-European	#CentralSpanish	#	CentralSpanish	[17]	0.0262	0.0269	0.0268	0.0323	0.0237	0.0226	0.0288	0.0236	0.0235	0.0285	0.0257	0.0085	0.0069	0.003	0.0022	0.0033
[18] #Uruguayan	Indo-European	#Uruguayan	#	Uruguayan	[18]	0.023	0.0244	0.024	0.0286	0.0207	0.0203	0.0258	0.0207	0.0201	0.0255	0.0232	0.0067	0.0057	0.0039	0.0021	0.0043	0.0023
[19] #ChihuahuaMexican	Indo-European	#ChihuahuaMexican	#	ChihuahuaMexican	[19]	0.0445	0.0471	0.0465	0.0522	0.0449	0.0441	0.05	0.046	0.0442	0.0525	0.0481	0.0278	0.0241	0.0183	0.0156	0.0212	0.02	0.0207
[20] #JaliscoMexican	Indo-European	#JaliscoMexican	#	JaliscoMexican	[20]	0.0437	0.045	0.0448	0.0512	0.0435	0.042	0.0484	0.0452	0.043	0.0502	0.0463	0.026	0.0225	0.017	0.0137	0.0197	0.0181	0.0189	0.0017
[21] #MexicoMexican	Indo-European	#MexicoMexican	#	MexicoMexican	[21]	0.0534	0.0548	0.0544	0.0602	0.0524	0.0517	0.0576	0.0545	0.0528	0.0606	0.0556	0.0345	0.0313	0.0222	0.021	0.0256	0.0258	0.0274	0.0048	0.0041
[22] #VeracruzMexican	Indo-European	#VeracruzMexican	#	VeracruzMexican	[22]	0.0498	0.05	0.0502	0.0566	0.0485	0.0473	0.0535	0.0501	0.0483	0.0555	0.0509	0.0301	0.0263	0.0192	0.016	0.0209	0.0197	0.0223	0.004	0.0024	0.003
[23] #YucatanMexican	Indo-European	#YucatanMexican	#	YucatanMexican	[23]	0.0588	0.0599	0.0598	0.0675	0.0595	0.0569	0.0633	0.0613	0.0587	0.0655	0.0613	0.0391	0.0351	0.0267	0.023	0.0277	0.0279	0.03	0.0048	0.0046	0.0041	0.0031
[24] #MexicanAmerindian	Indo-European	#MexicanAmerindian	#	MexicanAmerindian	[24]	0.0718	0.0724	0.0732	0.0798	0.0716	0.0698	0.077	0.0752	0.0718	0.0796	0.0749	0.0519	0.0477	0.0365	0.0317	0.0389	0.0393	0.0427	0.0093	0.009	0.0087	0.0064	0.0053
[25] #Nigeria	Afro-Asiatic	#Nigeria	#	Nigeria	[25]	0.0558	0.0565	0.0552	0.0617	0.0524	0.05	0.0532	0.0507	0.0476	0.0569	0.0564	0.037	0.034	0.039	0.0367	0.039	0.0318	0.0288	0.0558	0.0532	0.0661	0.0568	0.0645	0.0831
[26] #Yao	sino-tibetan	#Yao	#	Yao	[26]	0.0053	0.0034	0.0045	0.0065	0.0054	0.0065	0.0059	0.0086	0.0063	0.0045	0.0043	0.015	0.017	0.0305	0.0319	0.0351	0.0327	0.0301	0.0552	0.0526	0.0631	0.0573	0.0691	0.0788	0.0617
[27] #Kelao	sino-tibetan	#Kelao	#	Kelao	[27]	0.0035	0.001	0.0018	0.0043	0.0023	0.0031	0.0028	0.0063	0.0041	0.0026	0.0008	0.0096	0.0112	0.0238	0.0249	0.0239	0.0237	0.0214	0.0451	0.0431	0.0525	0.0478	0.0578	0.0697	0.0538	0.0042
[28] #Zhuang	sino-tibetan	#Zhuang	#	Zhuang	[28]	0.0041	0.001	0.0021	0.0048	0.0032	0.004	0.0031	0.0075	0.0056	0.0025	0.0012	0.0124	0.0144	0.0281	0.0293	0.0269	0.0281	0.026	0.0522	0.0496	0.0601	0.0548	0.0652	0.0773	0.0597	0.0042	0.0011
