# Supplementary material for: Genetic variation and forensic efficiency of 30 indels for three ethnic groups in Guangxi: relationships with other populations
Source: PeerJ. 2019 May 3;7:e6861. doi: 10.7717/peerj.6861 (PMC6501771; doi:10.7717/peerj.6861)
Supplement: Supplemental Information 5 [file peerj-07-6861-s005.xlsx]

## Sheet: Sheet1
Supplementary Table 1a: Allele frequencies and forensic parameters of the 30 INDELs in 200 Guangxi Zhuang individuals.
INDELS	DIP-	DIP+	Ho	He	PIC	PD	MP	PE	TPI	HWE
HLD6	0.55	0.45	0.48	0.495	0.372	0.6294	0.3706	0.171	0.961538	0.645971
HLD39	0.915	0.085	0.14	0.15555	0.143	0.26615	0.7339	0.016	0.581395	0.534372
HLD40	0.355	0.645	0.48	0.45795	0.353	0.59235	0.4077	0.171	0.961538	0.553052
HLD45	0.345	0.655	0.48	0.45195	0.35	0.58635	0.4137	0.171	0.961538	0.444444
HLD48	0.595	0.405	0.54	0.48195	0.366	0.58455	0.4155	0.225	1.08696	0.107693
HLD56	0.49	0.51	0.44	0.4998	0.375	0.6494	0.3506	0.14	0.892857	0.0841977
HLD58	0.45	0.55	0.51	0.495	0.372	0.61485	0.3852	0.196	1.02041	0.697139
HLD64	0.15	0.85	0.23	0.255	0.222	0.40565	0.5944	0.038	0.649351	0.405853
HLD67	0.245	0.755	0.39	0.36995	0.302	0.5318	0.4682	0.108	0.819672	0.575571
HLD70	0.355	0.645	0.49	0.45795	0.353	0.5878	0.4122	0.179	0.980392	0.380494
HLD77	0.58	0.42	0.44	0.4872	0.369	0.6368	0.3632	0.14	0.892857	0.170711
HLD81	0.215	0.785	0.37	0.33755	0.281	0.5022	0.4978	0.097	0.793651	0.344866
HLD83	0.635	0.365	0.45	0.46355	0.356	0.6098	0.3902	0.147	0.909091	0.676567
HLD84	0.1775	0.8225	0.245	0.291988	0.249	0.44695	0.5531	0.043	0.662252	0.138032
HLD88	0.5	0.5	0.56	0.5	0.375	0.5896	0.4104	0.246	1.13636	0.0965895
HLD92	0.5525	0.4475	0.515	0.494488	0.372	0.61165	0.3884	0.201	1.03093	0.585652
HLD93	0.4675	0.5325	0.465	0.497887	0.374	0.63855	0.3615	0.159	0.934579	0.334297
HLD97	0.6325	0.3675	0.445	0.464888	0.357	0.61285	0.3872	0.144	0.900901	0.550617
HLD99	0.085	0.915	0.17	0.15555	0.143	0.2822	0.7178	0.022	0.60241	0.583641
HLD101	0.5325	0.4675	0.465	0.497887	0.374	0.63855	0.3615	0.159	0.934579	0.334297
HLD111	0.8525	0.1475	0.285	0.251487	0.22	0.41465	0.5854	0.058	0.699301	0.284205
HLD114	0.825	0.175	0.29	0.28875	0.247	0.4526	0.5474	0.06	0.704225	0.986906
HLD118	0.085	0.915	0.14	0.15555	0.143	0.26615	0.7339	0.016	0.581395	0.534372
HLD122	0.87	0.13	0.23	0.2262	0.201	0.37685	0.6232	0.038	0.649351	0.913051
HLD124	0.4425	0.5575	0.485	0.493387	0.372	0.62555	0.3745	0.175	0.970874	0.785449
HLD125	0.6825	0.3175	0.445	0.433387	0.339	0.58135	0.4187	0.144	0.900901	0.763934
HLD128	0.71	0.29	0.41	0.4118	0.327	0.56965	0.4304	0.12	0.847458	0.935164
HLD131	0.6975	0.3025	0.405	0.421988	0.333	0.58095	0.4191	0.117	0.840336	0.605472
HLD133	0.6175	0.3825	0.435	0.472388	0.361	0.62355	0.3765	0.137	0.884956	0.274617
HLD136	0.535	0.465	0.5	0.49755	0.374	0.623	0.3775	0.1875	1	0.972856
DIP; DIP-: deletion; DIP+: insertion; Ho: observed heterozygosity; He: expected heterozygosity; PIC: polymorphic information contents; PD: power of discrimination; MP: matching probability; PE: power of exclusion; TPI: typical paternity index; HWE: Hardy–Weinberg equilibrium.
Supplementary Table 1b: Allele frequencies and forensic parameters of the 30 INDELs in 162 Guangxi Yao individuals.
INDELS	DIP-	DIP+	Ho	He	PIC	PD	MP	PE	TPI	HWE
HLD6	0.527778	0.4722	0.475309	0.498457	0.374227	0.635	0.365112	0.166794	0.952941	0.529651
HLD39	0.947531	0.0525	0.0802469	0.0994323	0.0944889	0.17	0.82998	0.00556527	0.543624	0.40768
HLD40	0.339506	0.6605	0.444444	0.448483	0.347915	0.597	0.403368	0.143339	0.9	0.88956
HLD45	0.42284	0.5772	0.5	0.488093	0.368975	0.613	0.386907	0.1875	1	0.791236
HLD48	0.506173	0.4938	0.432099	0.499924	0.374962	0.652	0.348041	0.134671	0.880435	0.0774042
HLD56	0.37963	0.6204	0.438272	0.471022	0.360091	0.621	0.378829	0.138955	0.89011	0.383137
HLD58	0.481481	0.5185	0.469136	0.499314	0.374657	0.638	0.361683	0.161892	0.94186	0.41934
HLD64	0.0524691	0.9475	0.104938	0.0994323	0.0944889	0.188	0.812148	0.00916048	0.558621	0.825252
HLD67	0.166667	0.8333	0.308642	0.277778	0.239198	0.444	0.55647	0.0671537	0.723214	0.394319
HLD70	0.506173	0.4938	0.555556	0.499924	0.374962	0.593	0.407484	0.240902	1.125	0.168586
HLD77	0.527778	0.4722	0.475309	0.498457	0.374227	0.635	0.365112	0.166794	0.952941	0.529651
HLD81	0.197531	0.8025	0.296296	0.317025	0.266772	0.482	0.518366	0.062029	0.710526	0.552948
HLD83	0.623457	0.3765	0.444444	0.469517	0.359294	0.618	0.382335	0.143339	0.9	0.498798
HLD84	0.185185	0.8148	0.296296	0.301783	0.256247	0.466	0.533608	0.062029	0.710526	0.858808
HLD88	0.333333	0.6667	0.395062	0.444444	0.345679	0.605	0.394604	0.110946	0.826531	0.193684
HLD92	0.533951	0.466	0.487654	0.497695	0.373845	0.629	0.371361	0.176924	0.975904	0.768139
HLD93	0.533951	0.466	0.487654	0.497695	0.373845	0.629	0.371361	0.176924	0.975904	0.768139
HLD97	0.703704	0.2963	0.432099	0.41701	0.330061	0.569	0.430956	0.134671	0.880435	0.72182
HLD99	0.101852	0.8981	0.203704	0.182956	0.16622	0.324	0.675583	0.0307757	0.627907	0.506965
HLD101	0.58642	0.4136	0.493827	0.485063	0.36742	0.613	0.386907	0.182156	0.987805	0.853283
HLD111	0.882716	0.1173	0.222222	0.207057	0.185621	0.355	0.644795	0.0361056	0.642857	0.648596
HLD114	0.774691	0.2253	0.364198	0.349089	0.288158	0.514	0.485673	0.0935841	0.786408	0.708196
HLD118	0.0771605	0.9228	0.154321	0.142414	0.132273	0.261	0.738988	0.0185582	0.591241	0.676621
HLD122	0.771605	0.2284	0.358025	0.352462	0.290347	0.518	0.481786	0.0903544	0.778846	0.905229
HLD124	0.552469	0.4475	0.537037	0.494494	0.372232	0.599	0.401082	0.222014	1.08	0.296471
HLD125	0.555556	0.4444	0.580247	0.493827	0.371895	0.569	0.430956	0.267844	1.19118	0.0306905
HLD128	0.641975	0.358	0.530864	0.459686	0.35403	0.568	0.432175	0.215964	1.06579	0.0749013
HLD131	0.604938	0.3951	0.45679	0.477976	0.363745	0.622	0.37822	0.152408	0.920455	0.563629
HLD133	0.719136	0.2809	0.364198	0.403959	0.322368	0.569	0.430803	0.0935841	0.786408	0.287655
HLD136	0.709877	0.2901	0.382716	0.411904	0.327071	0.575	0.425088	0.103752	0.81	0.431036
DIP; DIP-: deletion; DIP+: insertion; Ho: observed heterozygosity; He: expected heterozygosity; PIC: polymorphic information contents; PD: power of discrimination; MP: matching probability; PE: power of exclusion; TPI: typical paternity index; HWE: Hardy–Weinberg equilibrium.
Supplementary Table 1c: Allele frequencies and forensic parameters of the 30 INDELs in 152 Guangxi Kelao individuals.
INDELS	DIP-	DIP+	Ho	He	PIC	PD	MP	PE	TPI	HWE
HLD6	0.513158	0.4868	0.539474	0.499654	0.374827	0.603	0.39742	0.224	1.086	0.347
HLD39	0.878289	0.1217	0.217105	0.213794	0.19094	0.36	0.639803	0.035	0.639	0.938
HLD40	0.355263	0.6447	0.5	0.458102	0.353174	0.583	0.416898	0.188	1	0.318
HLD45	0.421053	0.5789	0.605263	0.487535	0.36869	0.543	0.456717	0.297	1.267	0.004
HLD48	0.625	0.375	0.460526	0.46875	0.358887	0.611	0.38885	0.155	0.927	0.809
HLD56	0.5	0.5	0.578947	0.5	0.375	0.576	0.423823	0.266	1.188	0.057
HLD58	0.480263	0.5197	0.526316	0.499221	0.37461	0.61	0.389976	0.212	1.056	0.53
HLD64	0.134868	0.8651	0.243421	0.233358	0.20613	0.388	0.612102	0.043	0.661	0.787
HLD67	0.243421	0.7566	0.381579	0.368334	0.300499	0.532	0.46849	0.103	0.809	0.759
HLD70	0.325658	0.6743	0.493421	0.43921	0.342757	0.567	0.432566	0.182	0.987	0.19
HLD77	0.592105	0.4079	0.5	0.483033	0.366373	0.608	0.391967	0.188	1	0.705
HLD81	0.273026	0.727	0.414474	0.396966	0.318175	0.554	0.446243	0.123	0.854	0.683
HLD83	0.615132	0.3849	0.585526	0.473489	0.361393	0.545	0.455246	0.274	1.206	0.006
HLD84	0.226974	0.773	0.388158	0.350913	0.289343	0.513	0.486929	0.107	0.817	0.352
HLD88	0.509868	0.4901	0.546053	0.499805	0.374903	0.599	0.401402	0.231	1.101	0.271
HLD92	0.542763	0.4572	0.572368	0.496343	0.373165	0.577	0.422697	0.259	1.169	0.067
HLD93	0.404605	0.5954	0.519737	0.4818	0.365734	0.596	0.403653	0.205	1.041	0.37
HLD97	0.671053	0.3289	0.513158	0.441482	0.344029	0.56	0.440357	0.199	1.027	0.081
HLD99	0.121711	0.8783	0.230263	0.213794	0.19094	0.365	0.635474	0.039	0.65	0.636
HLD101	0.536184	0.4638	0.559211	0.497381	0.373687	0.588	0.412483	0.245	1.134	0.138
HLD111	0.848684	0.1513	0.289474	0.256839	0.223856	0.421	0.57938	0.059	0.704	0.37
HLD114	0.723684	0.2763	0.486842	0.399931	0.319958	0.531	0.46875	0.176	0.974	0.031
HLD118	0.0953947	0.9046	0.190789	0.172589	0.157696	0.309	0.691222	0.027	0.618	0.566
HLD122	0.845395	0.1546	0.243421	0.261405	0.227239	0.416	0.584055	0.043	0.661	0.597
HLD124	0.476974	0.523	0.585526	0.49894	0.374469	0.57	0.429796	0.274	1.206	0.036
HLD125	0.5625	0.4375	0.572368	0.492188	0.371063	0.573	0.426852	0.259	1.169	0.053
HLD128	0.707237	0.2928	0.480263	0.414106	0.328364	0.548	0.45161	0.171	0.962	0.105
HLD131	0.6875	0.3125	0.388158	0.429688	0.337372	0.592	0.408154	0.107	0.817	0.285
HLD133	0.605263	0.3947	0.539474	0.477839	0.363674	0.581	0.419235	0.224	1.086	0.138
HLD136	0.549342	0.4507	0.598684	0.495131	0.372554	0.556	0.443819	0.289	1.246	0.012
DIP; DIP-: deletion; DIP+: insertion; Ho: observed heterozygosity; He: expected heterozygosity; PIC: polymorphic information contents; PD: power of discrimination; MP: matching probability; PE: power of exclusion; TPI: typical paternity index; HWE: Hardy–Weinberg equilibrium.
