# Supplementary material for: Genetic variation and forensic efficiency of 30 indels for three ethnic groups in Guangxi: relationships with other populations
Source: PeerJ. 2019 May 3;7:e6861. doi: 10.7717/peerj.6861 (PMC6501771; doi:10.7717/peerj.6861)
Supplement: Supplemental Information 6 [file peerj-07-6861-s006.xlsx]

## Sheet: Sheet1
Supplementary Table 2a: Parameters of genetic diversity and forensic efficiency for the 30 INDELs in Guangxi Zhuang individuals.
Population	MHo	MHe	CMP		CPD			CPE
Guangxi Zhuang	0.398	0.399	3.92155*10-11		1			0.9845
MHo: mean value of observed heterozygosity; MHe: mean value of expected heterozygosity; CMP: combined matching probability; CPD: combined power of discrimination; CPE: combined power of paternity exclusion.
Supplementary Table 2b: Parameters of genetic diversity and forensic efficiency for the 30 INDELs in Guangxi Yao individuals.
Population	MHo	MHe	CMP		CPD			CPE
Guangxi Yao	0.392	0.393	5.67125*10-11		1			0.9843
MHo: mean value of observed heterozygosity; MHe: mean value of expected heterozygosity; CMP: combined matching probability; CPD: combined power of discrimination; CPE: combined power of paternity exclusion.
Supplementary Table 2c: Parameters of genetic diversity and forensic efficiency for the 30 INDELs in Guangxi Kelao individuals.
Population	MHo	MHe	CMP		CPD			CPE
Guangxi Kelao	0.458	0.413	8.16168*10-11		1			0.9972
MHo: mean value of observed heterozygosity; MHe: mean value of expected heterozygosity; CMP: combined matching probability; CPD: combined power of discrimination; CPE: combined power of paternity exclusion.
